# Supplementary material for: Functional study of Amorpha fruticosa WRKY20 gene in response to drought stress
Source: Preprints.org preprint supplement (doi:10.20944/preprints202307.1202.v1), 2023-07-18
Supplement: Supplementary file 3 [file supplementary]

Supplementary Material

# **Supplementary Tables**

**Table 1 Primers needed in the experiment**

| **Primer name** | **Primer Sequence (5'-3')** | **Function** |
| --- | --- | --- |
| ***AfWRKY20*-F1** | **TCTAGACTATGAACGGAGCTACCACC** | **Gene Cloning** |
| ***AfWRKY20*-R1** | **GTCGACATGGACCCGTTAGTATTCT** |  |
| ***AfTubu.*F** | **ACAAGGCGGTTAAGGTTGGT** | ***Amorpha fruticosa***  **internal reference genes** |
| ***AfTubu.*R** | **GTTCTGGGCTTGGTTCCCTT** |  |
| **q*AfWRKY20* F** | **GAGTCCGACGTCGTTTTTGG** | **Real-time quantitative**  **specific primers** |
| **q*AfWRKY20* R** | **TTCAACAGGAGCACTAGCCC** |  |
| **W-box F1** | **GGAACTTGACCTTGACCTTAGGGCTGCAGGAATTCG** | **Probe primers for**  **the W-box of EMSA** |
| **W-box R1** | **CGAATTCCTGCAGCCCCTAAGGTCAAGGTCAAGTCC** |  |
| **W-box F** | **GGGCCCCCCCTCGAGGTCGACCGTTGACCGTTGACCGAGTTGACTTTTTTAG** | **W-box probe primer for**  **the Dual LUC activity** |
| **W-box R** | **CGCTCTAGAACTAGTGGATCCTAAAAAAGTCAACTCGGTCAACGGTCAACGC** |  |
| **mWbox F** | **GGGCCCCCCCTCGAGGTCGACCGTAGACGGTAGACGGAGTAGACGTTTTTAG** | **mW-box probe primer for dual LUC activity** |
| **mWbox R** | **CGCTCTAGAACTAGTGGATCCTAAAAACGTCTACTCCGTCTACCGTCTACGC** |  |
| ***AfWRKY20***  **-62-SK F** | **CGCTCTAGAACTAGTGGATCCATGAACGGAGCTACCACCAA** | **Gene primers for Double LUC activity** |
| ***AfWRKY20***  **-62-SK R** | **GGTACCGGGCCCCCCCTCGAGGTCGACTCATGGACCCGTTAGTATTCTTC** |  |
| ***NbActin* F** | **CTGCTGGAATTCACGAAACA** | **Tabacco internal**  **reference genes** |
| ***NbActin* R** | **GCCACCACCTTGATCTTCAT** |  |
| ***NbSOD* F** | **CTCCTACCGTCGCCAAAT** | **Real-time quantitative**  **specific primers** |
| ***NbSOD* R** | **GCCCAACCAAGAGAACCC** |  |
| ***NbCAT* F** | **AGGTACCGCTCATTCACACC** | **Real-time quantitative**  **specific primers** |
| ***NbCAT R*** | **AAGCAAGCTTTTGACCCAGA** |  |
| ***NbPOD* F** | **TCCTGGAGTTGTTGCCTTGCTAG** | **Real-time quantitative**  **specific primers** |
| ***NbPOD* R** | **GCTTAGTCCTCTTGTCCGTTGCTA** |  |

# **Supplementary Figures**

**
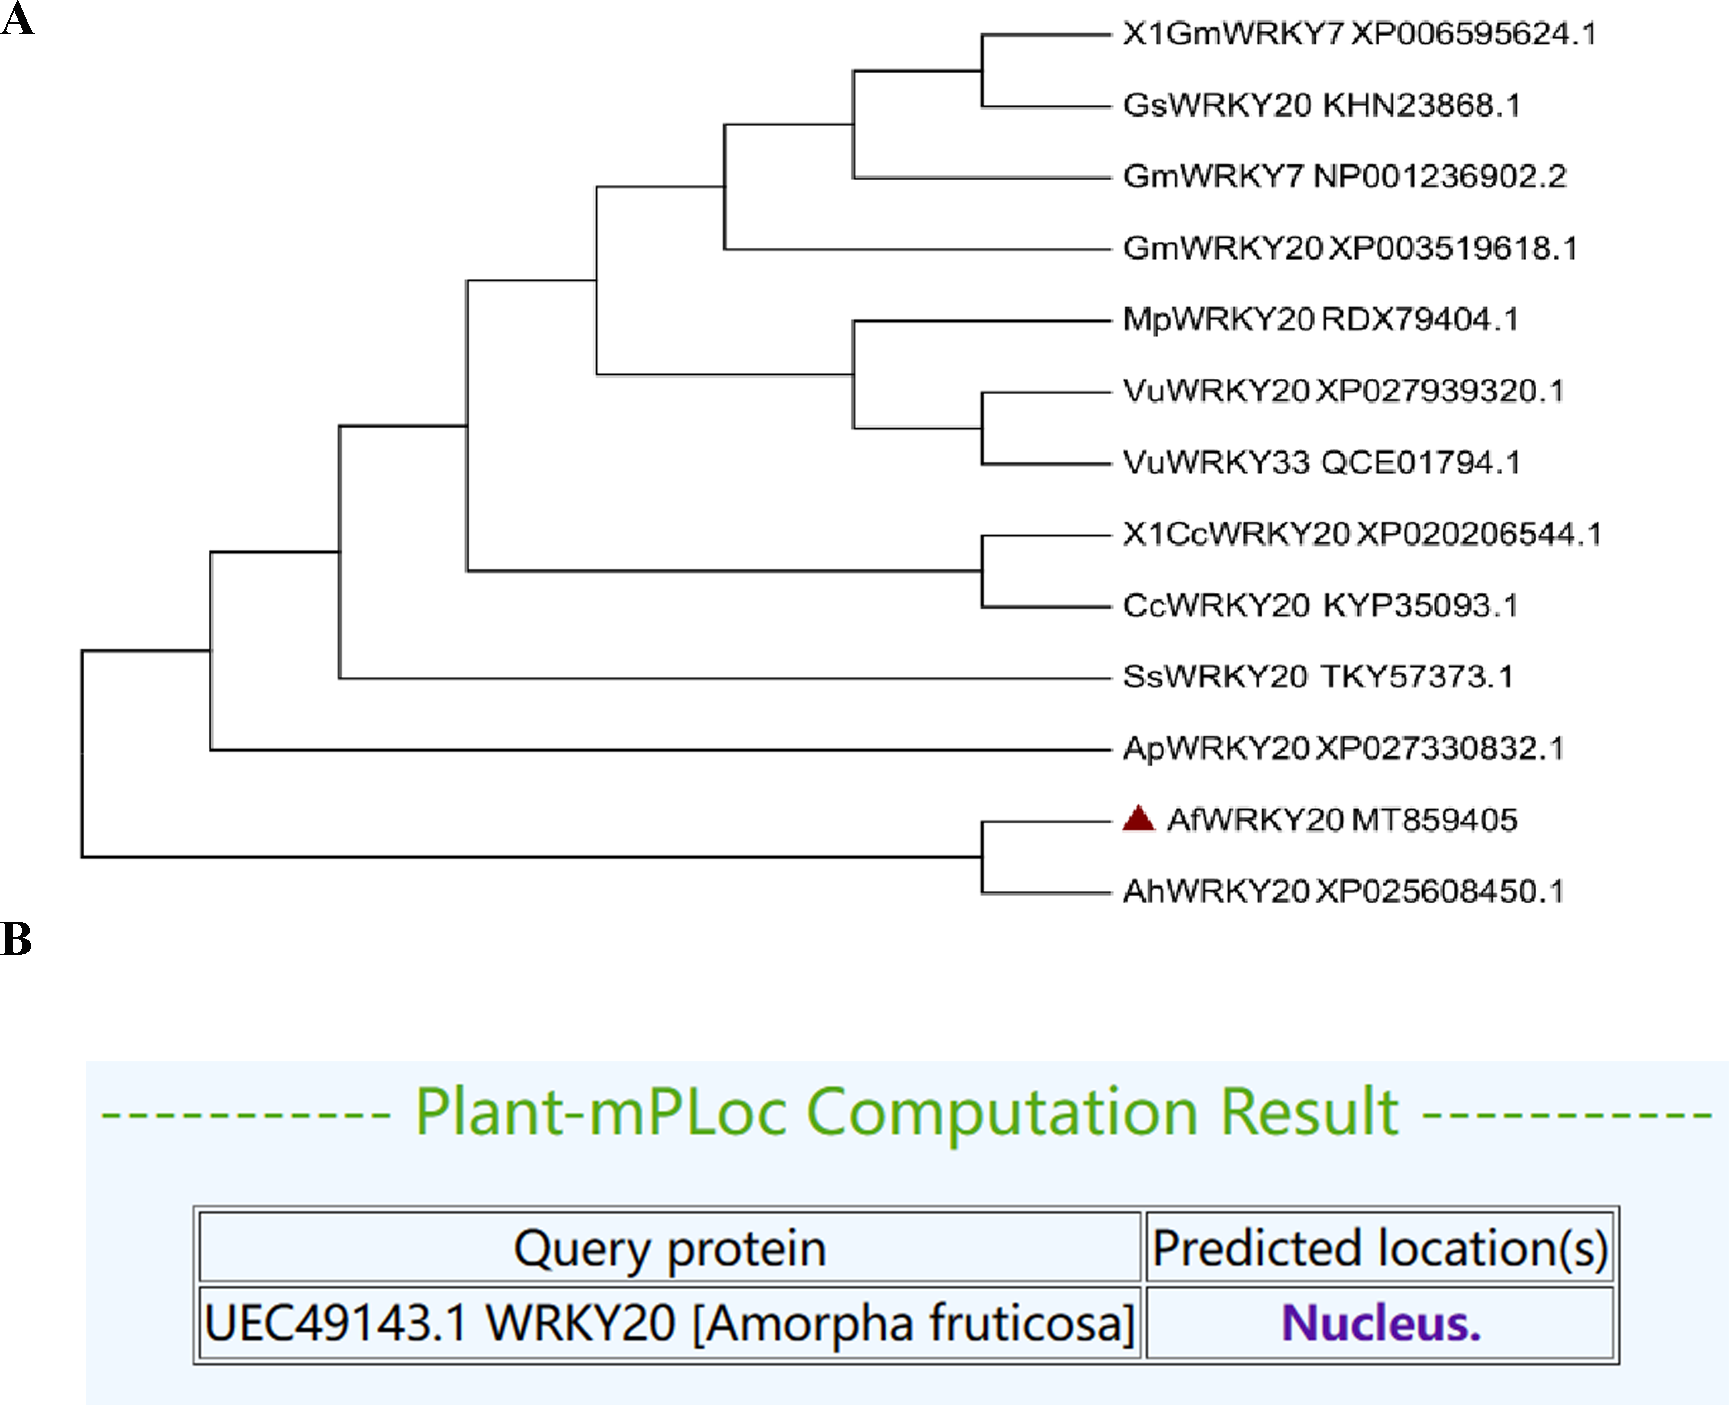
**

**Supplementary Figure 1.** (A) AfWRKY20 protein phylogenetic tree.Note:Spatholobus suberectus;Glycine max;Cajanus cajan;Abrus precatorius;Mucuna pruriens;Vigna unguiculata;Arachis hypogaea;Glycine soja.(B) Predicted subcellular localization of AfWRKY20 protein.

**
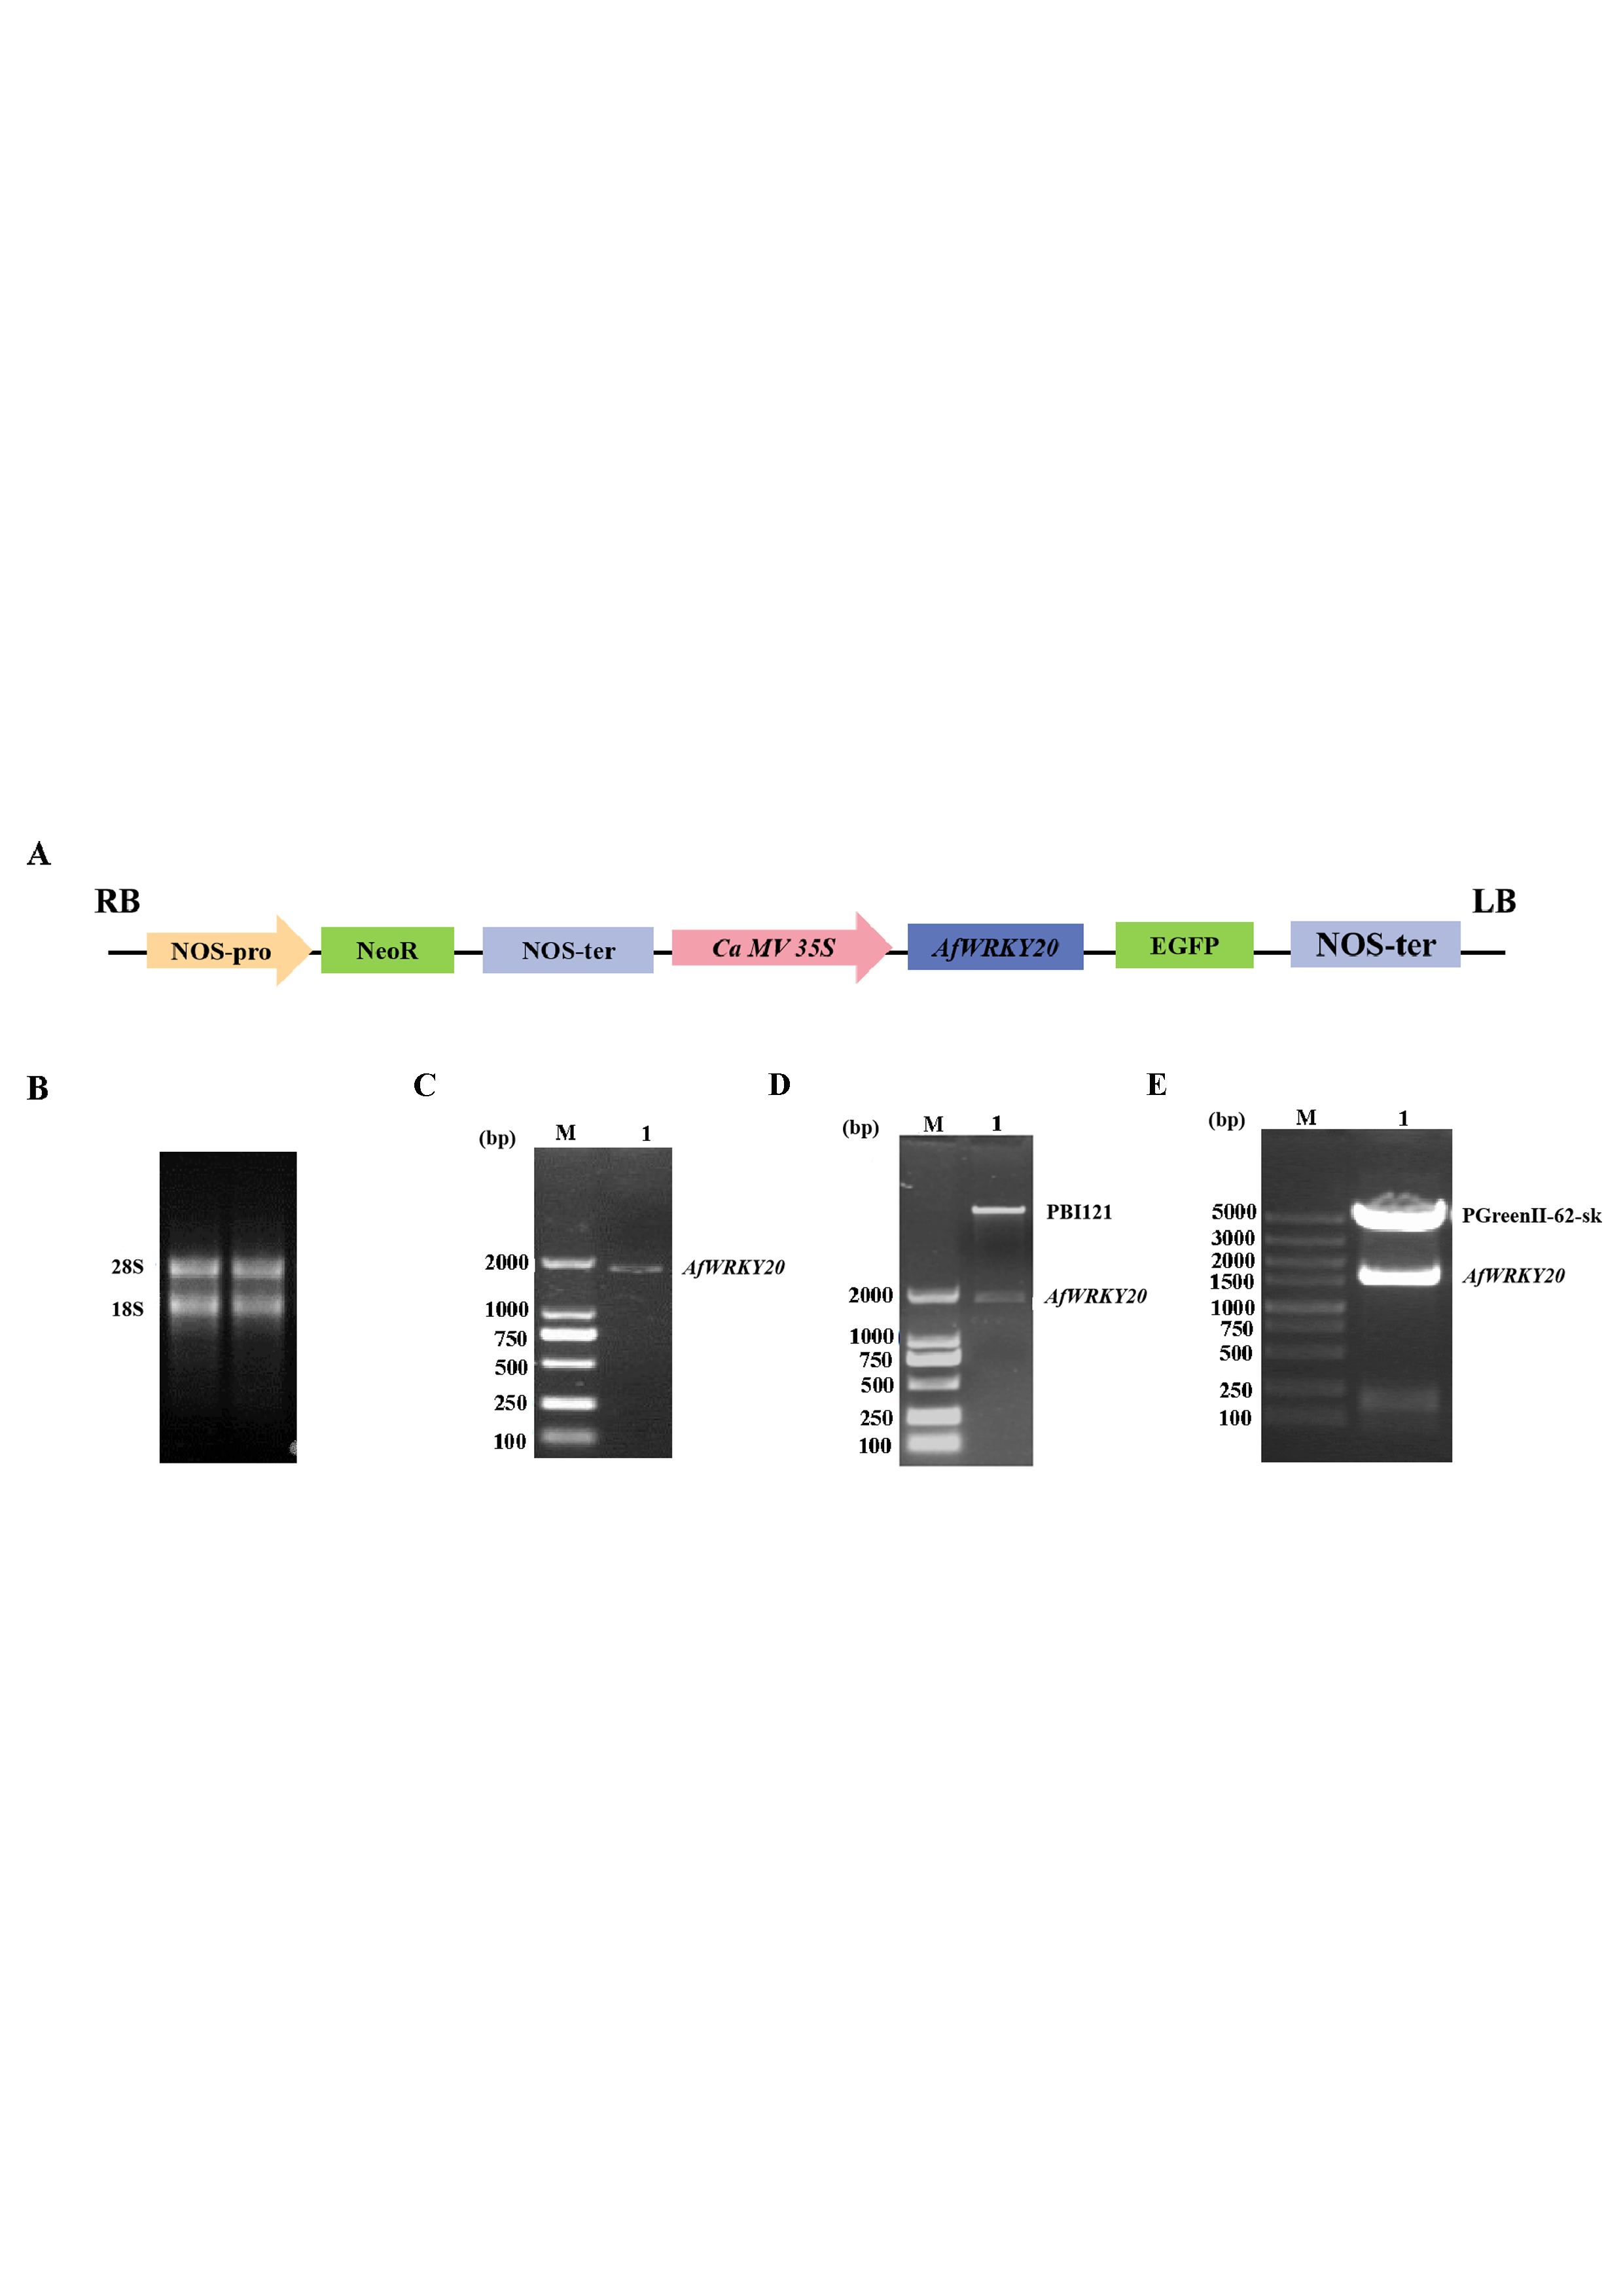
**

**Supplementary Figure 2.** (A) Diagram of PBI121-*AfWRKY20*-*GFP*.(B) Extraction of total RNA from *Amorpha fruticosa* leaves.(C) PCR amplification product electrophoresis detection.(D) Identification of PBI121::*AfWRKY20*::*GFP* digest.(E):Identification of PGreenⅡ-62-sk::*AfWRKY20* digest.

**
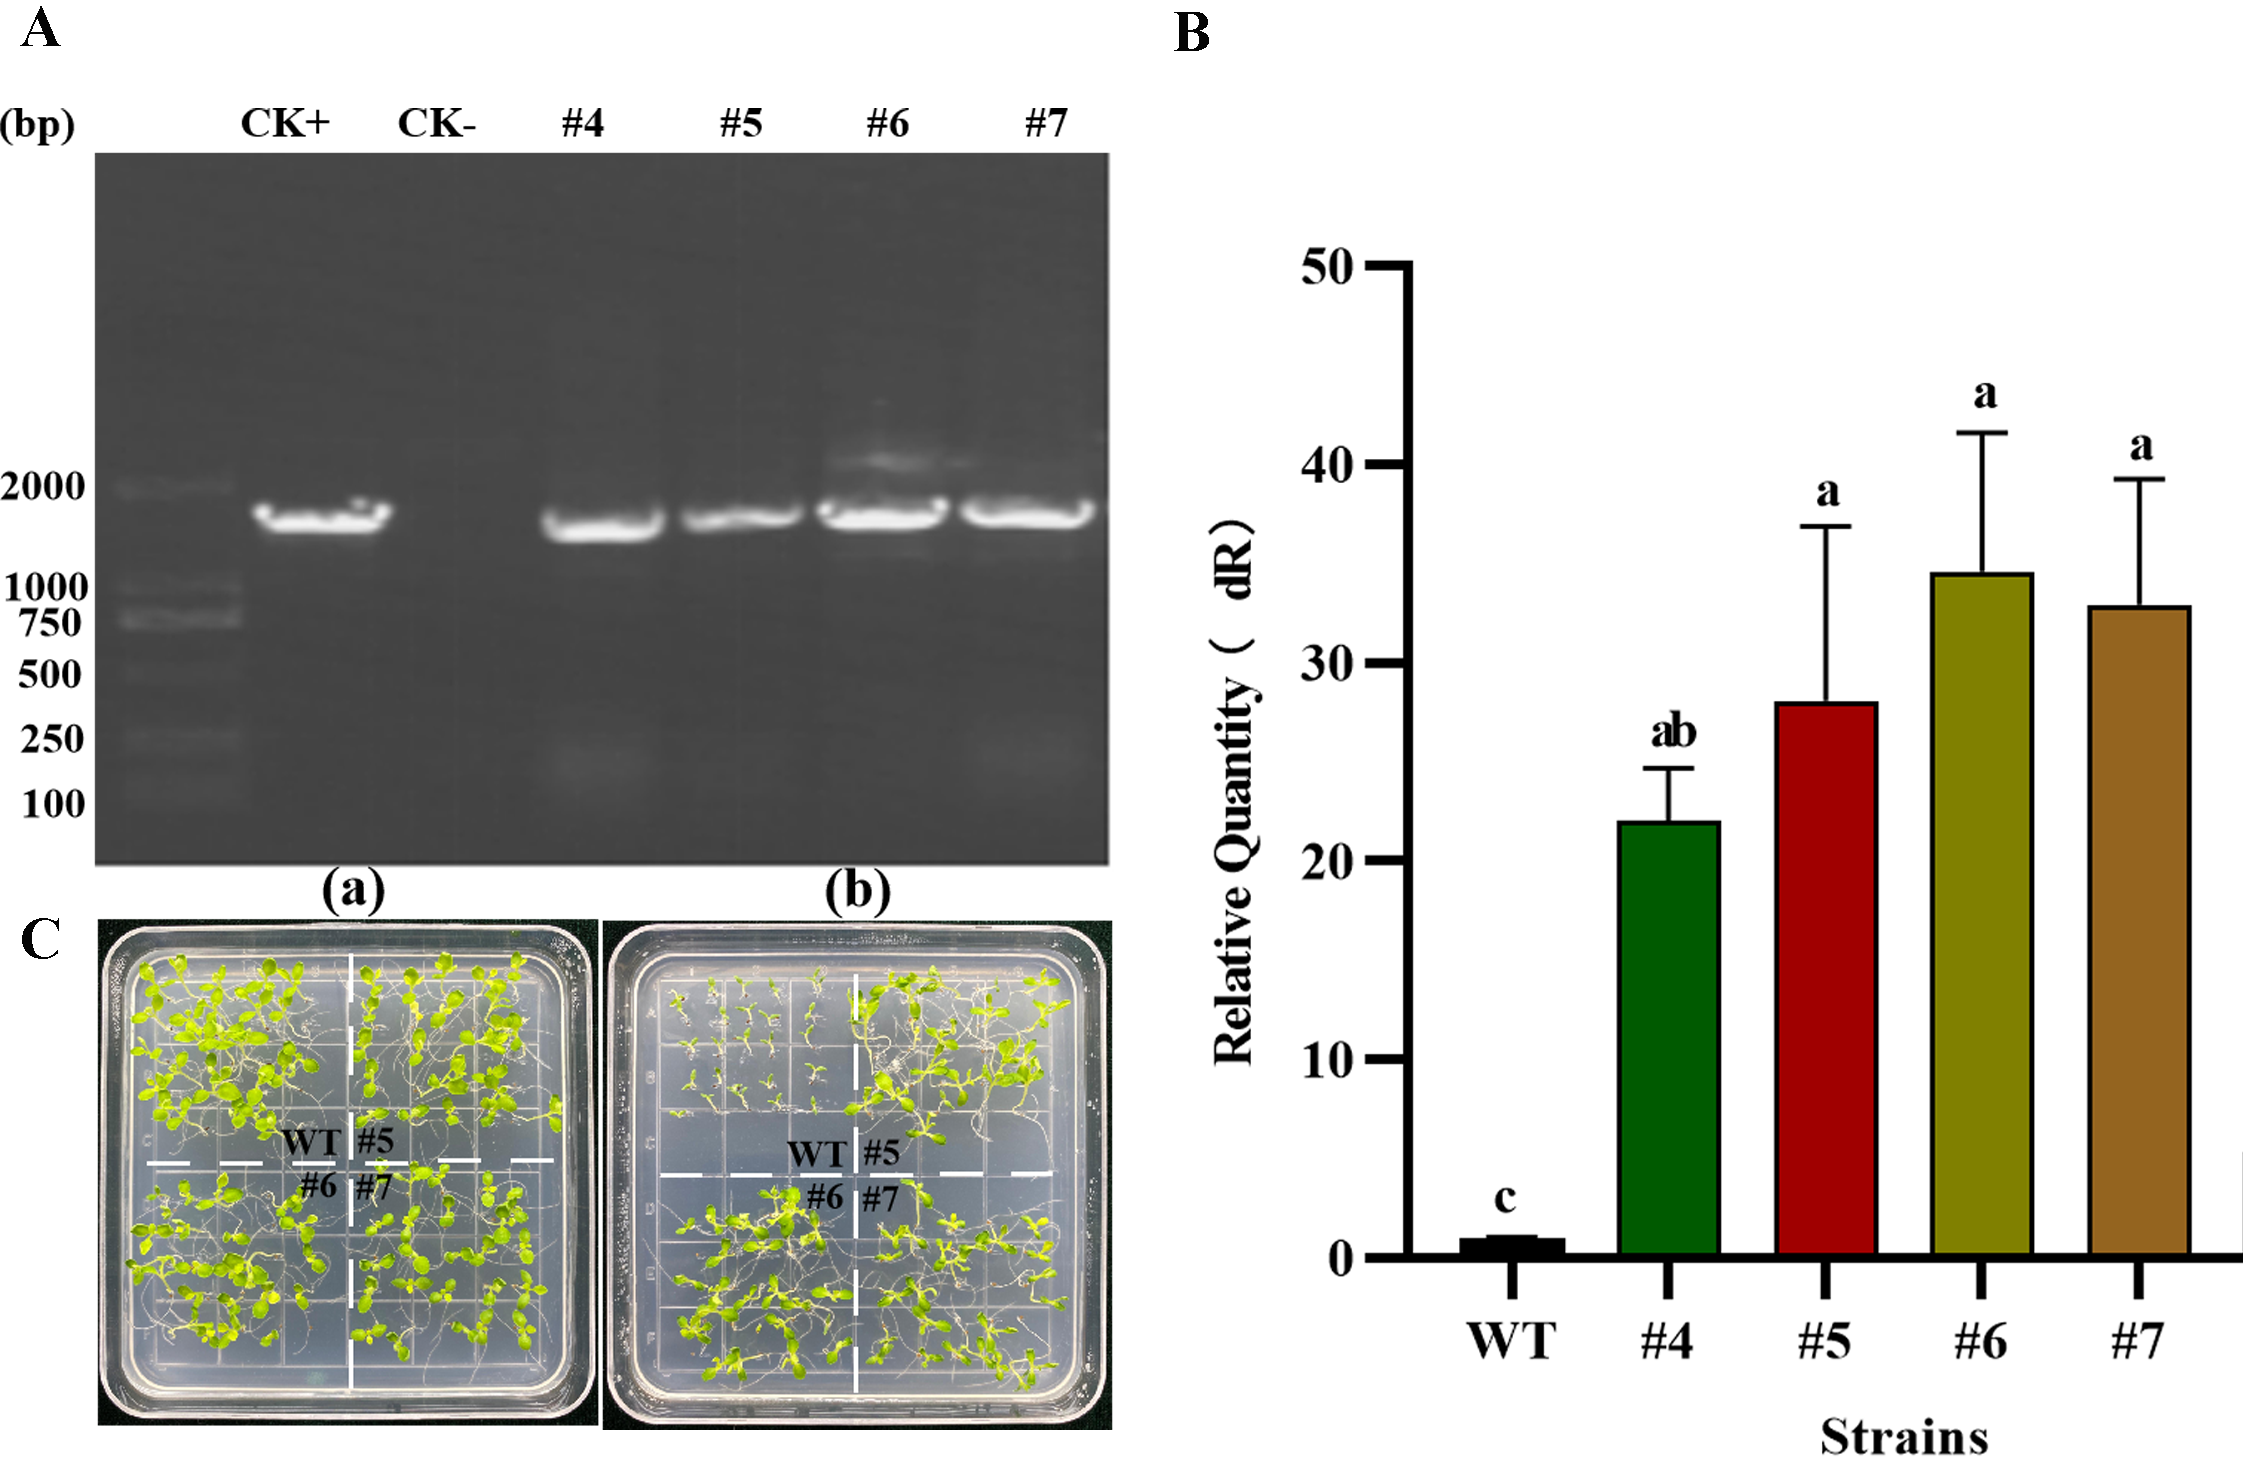
**

**Supplementary Figure 3.** (A) PCR identification of transgenic plants. (B) Relative expression analysis of *AfWRKY20* transgenic tobacco. (C) (a):1/2MS medium；(b):Kana resistance screening of overexpressed *AfWRKY20* tobacco transformed seedlings.

**
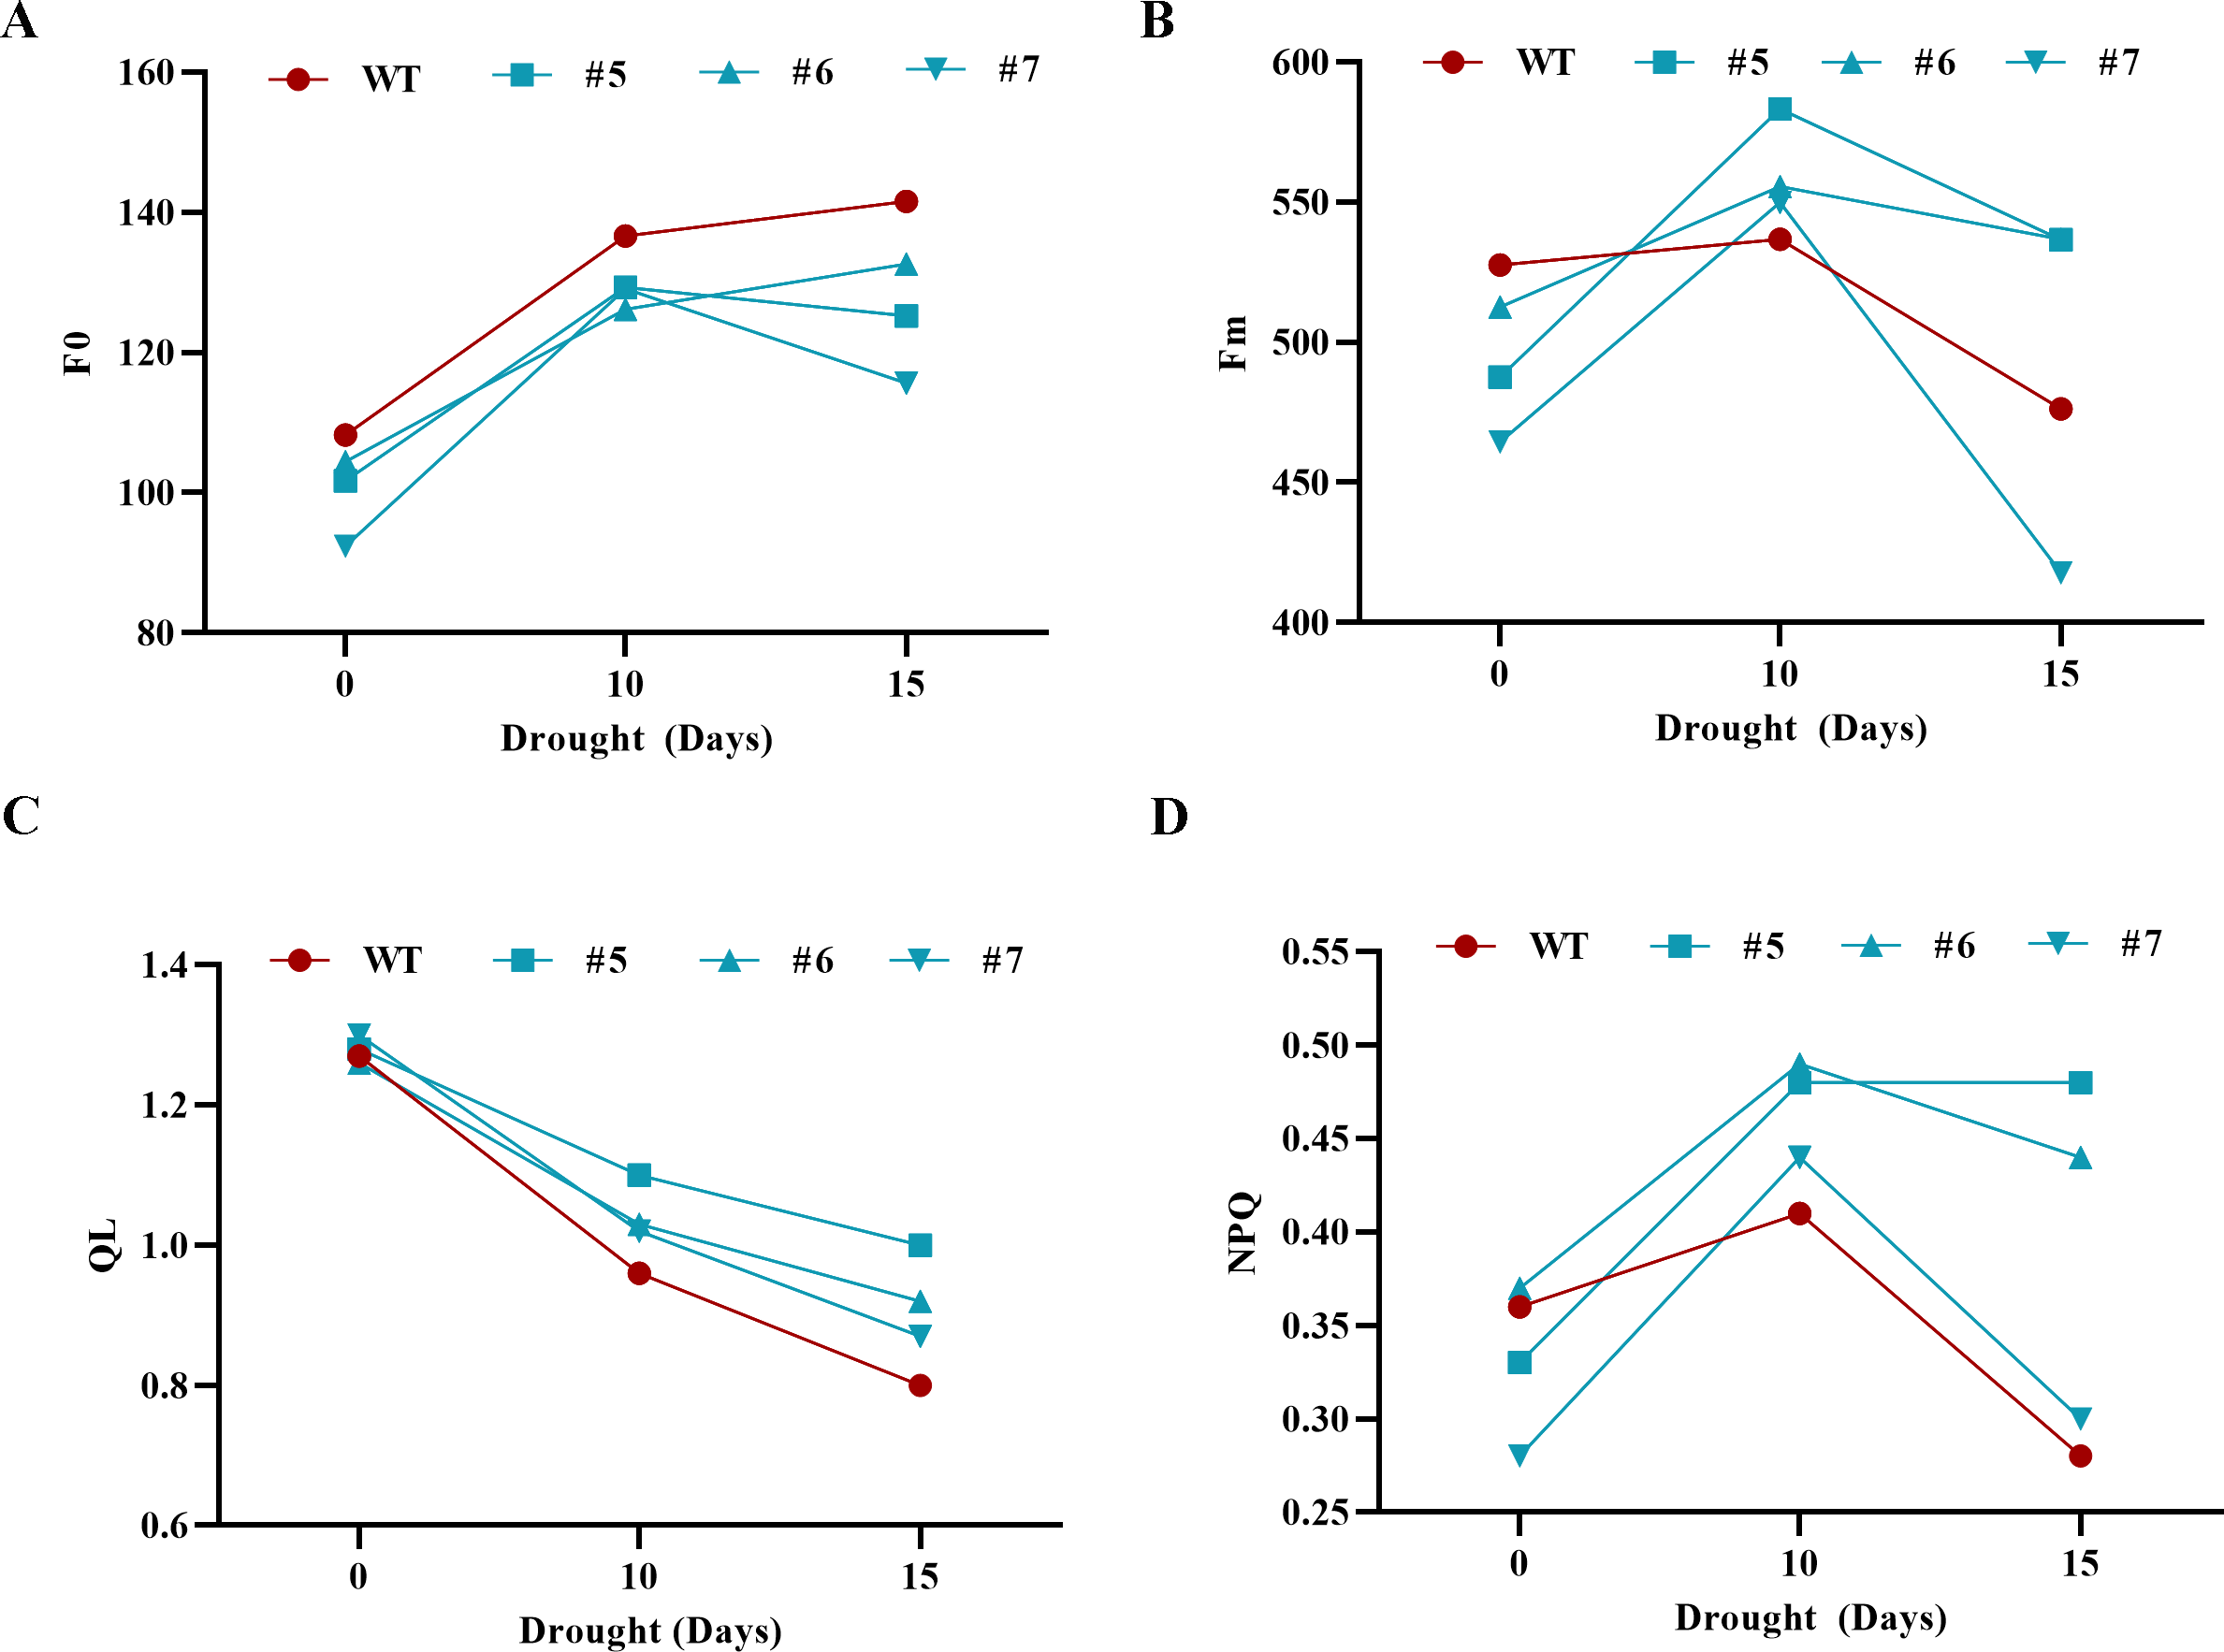
**

**Supplementary Figure 4.** Changes in chlorophyll fluorescence parameters of tobacco under natural drought stress for 15 days.(A) Variation of the minimum fluorescence yield (F0) in the absence of photosynthetic light. (B) Variation of maximum fluorescence yield (Fm) in the absence of photosynthetic light. (C) Variation of the proportion of open PSII reaction centers (QL).(D)Non-photochemical quenching（NPQ）.


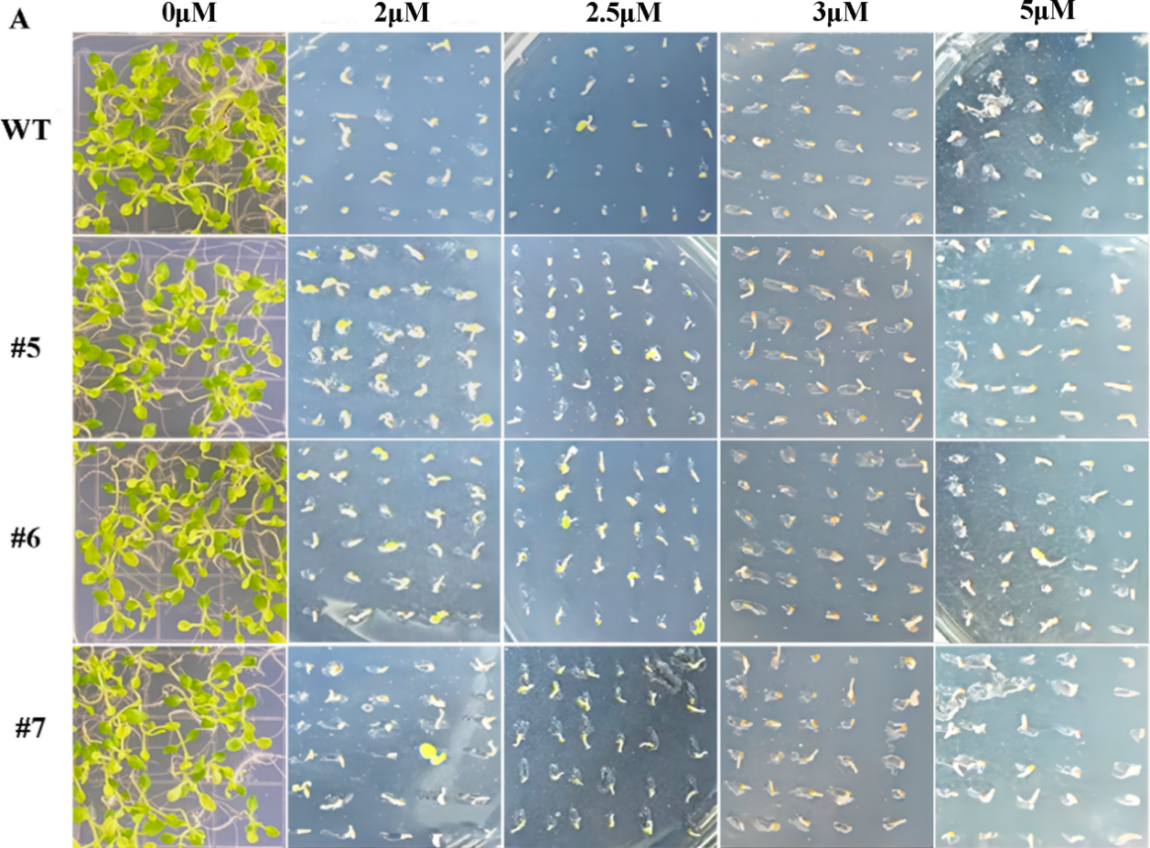


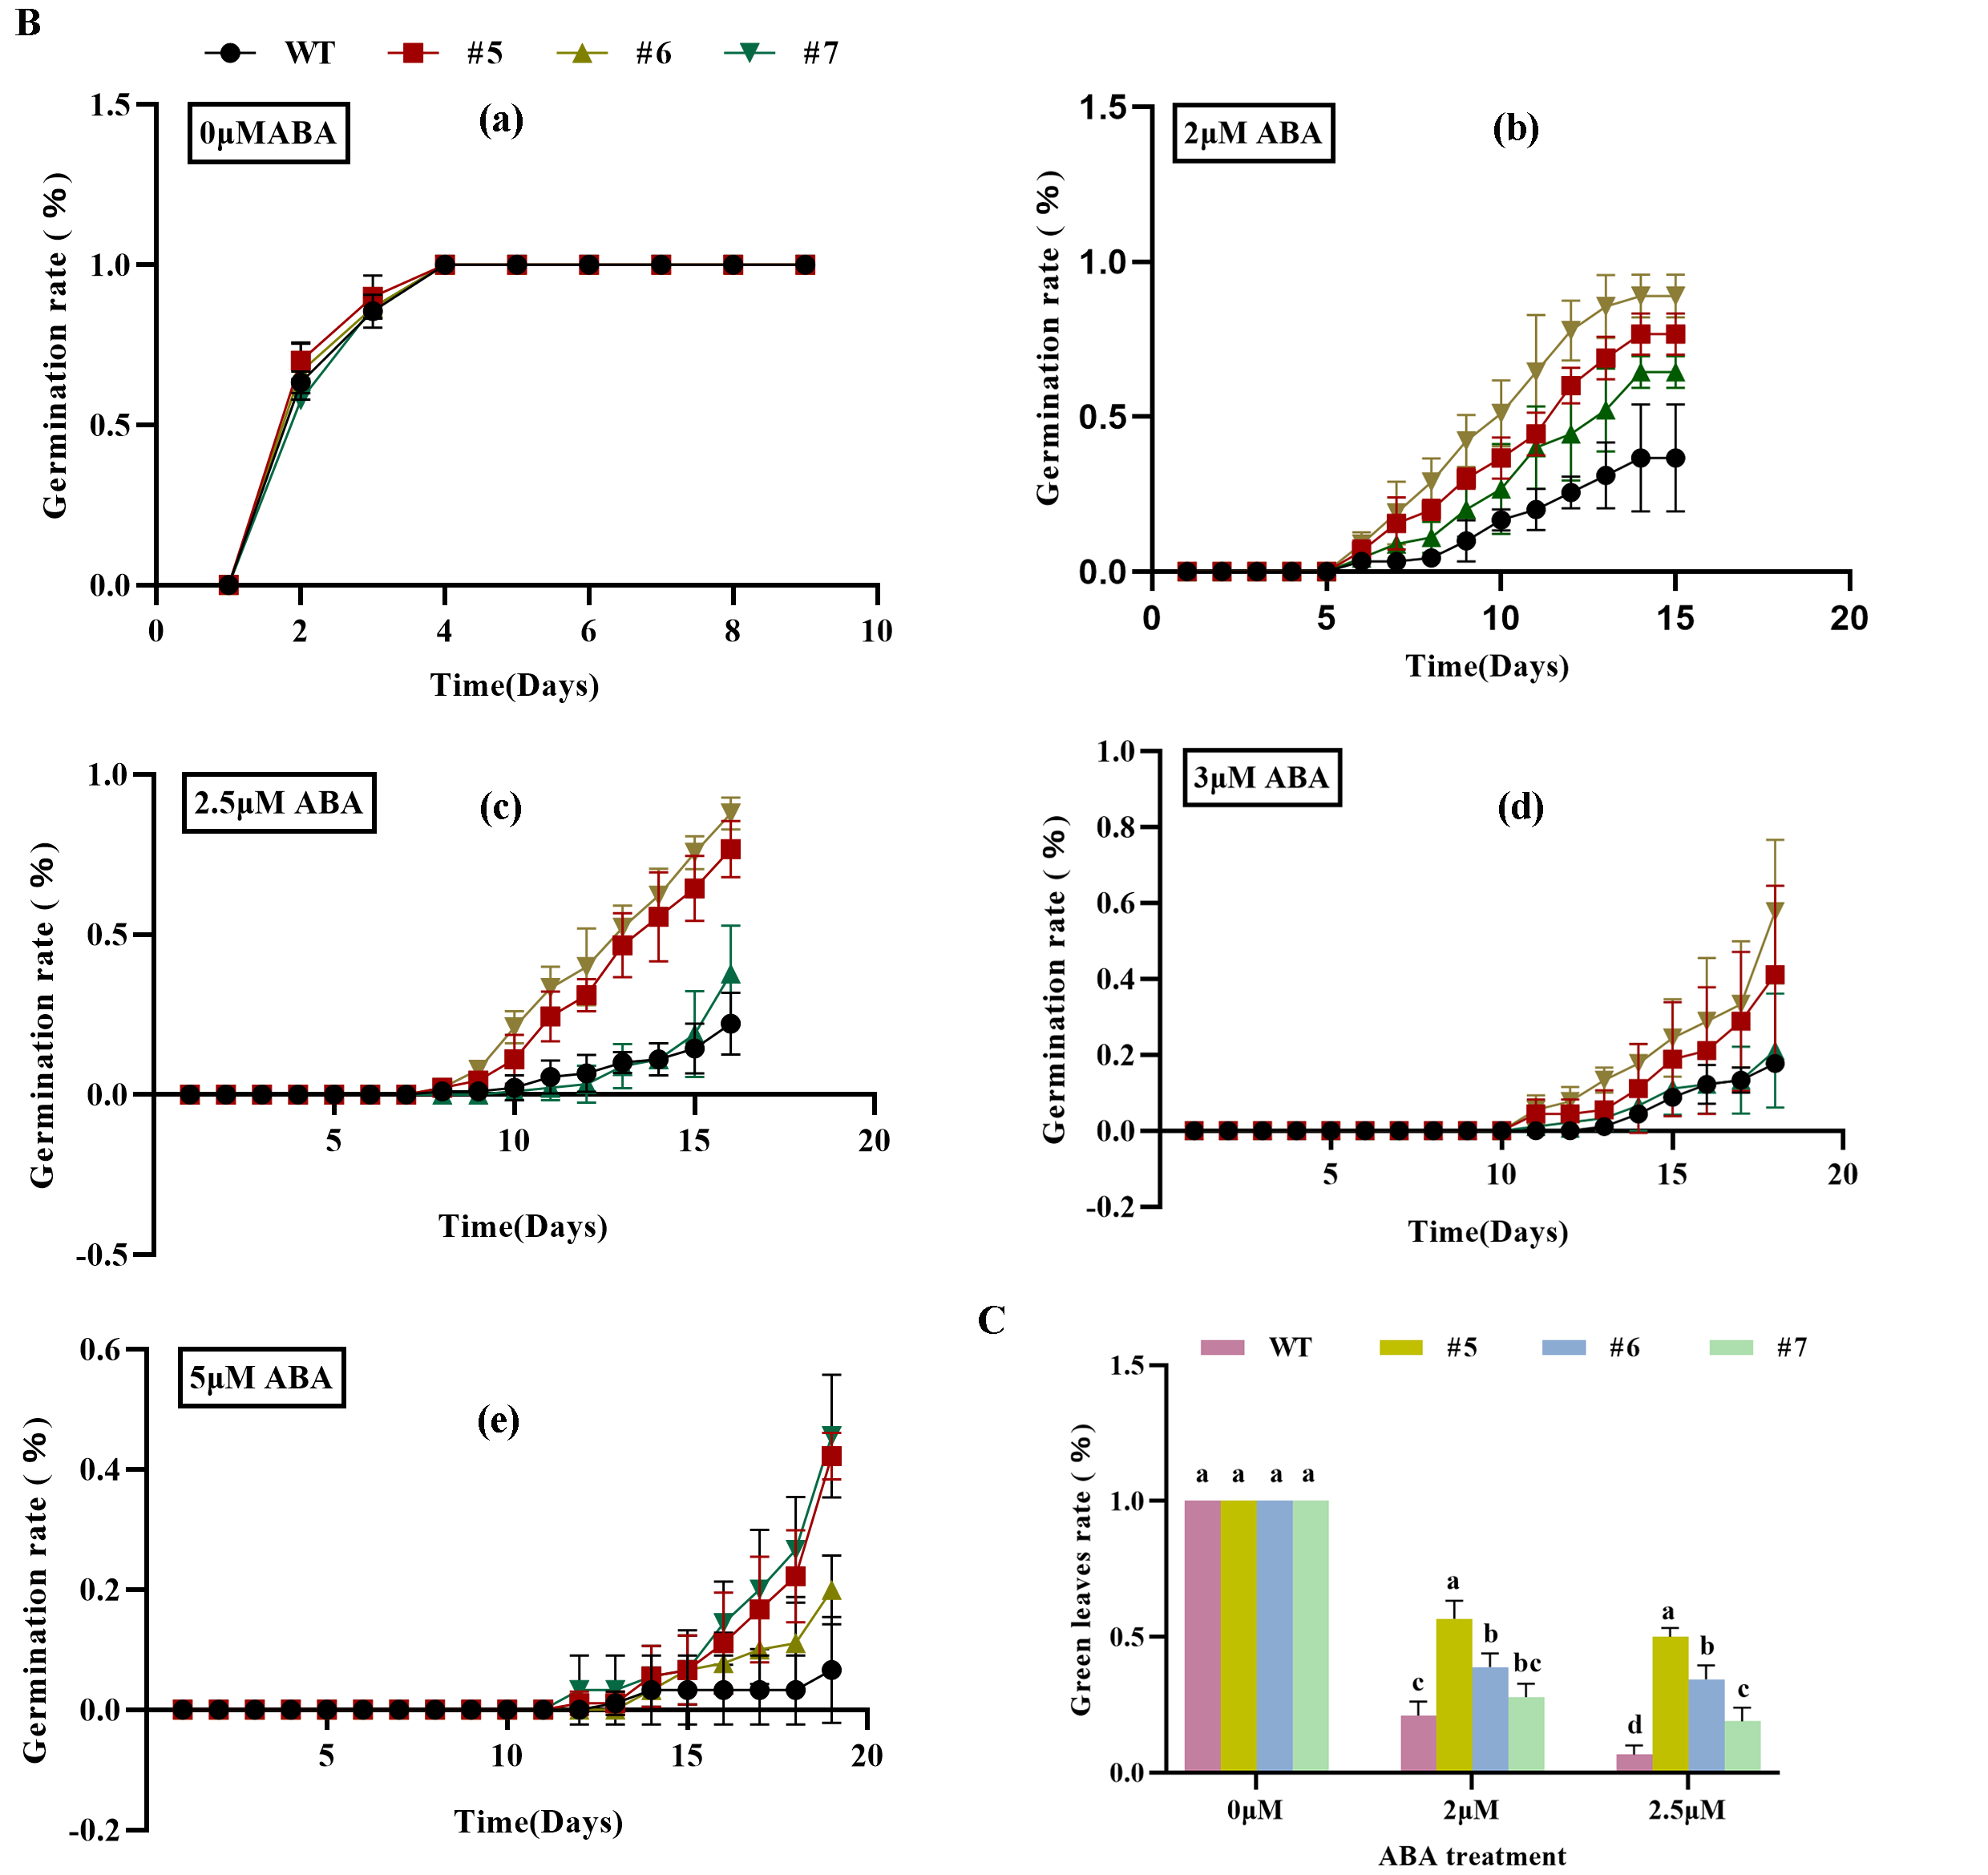


**Supplementary Figure 5.** Analysis of green leaf rate and germination rate of overexpression strain AfWRKY20 under different concentrations of ABA stress.(A) Germination phenotype of sorbitol treatment simulating drought treatment.(B) Measurement of plant germination rate.(C) Measurement of plant green leaf rate.Error bars indicate standard errors of three biological replicates, which are significantly different at the *p*<0.05 level.


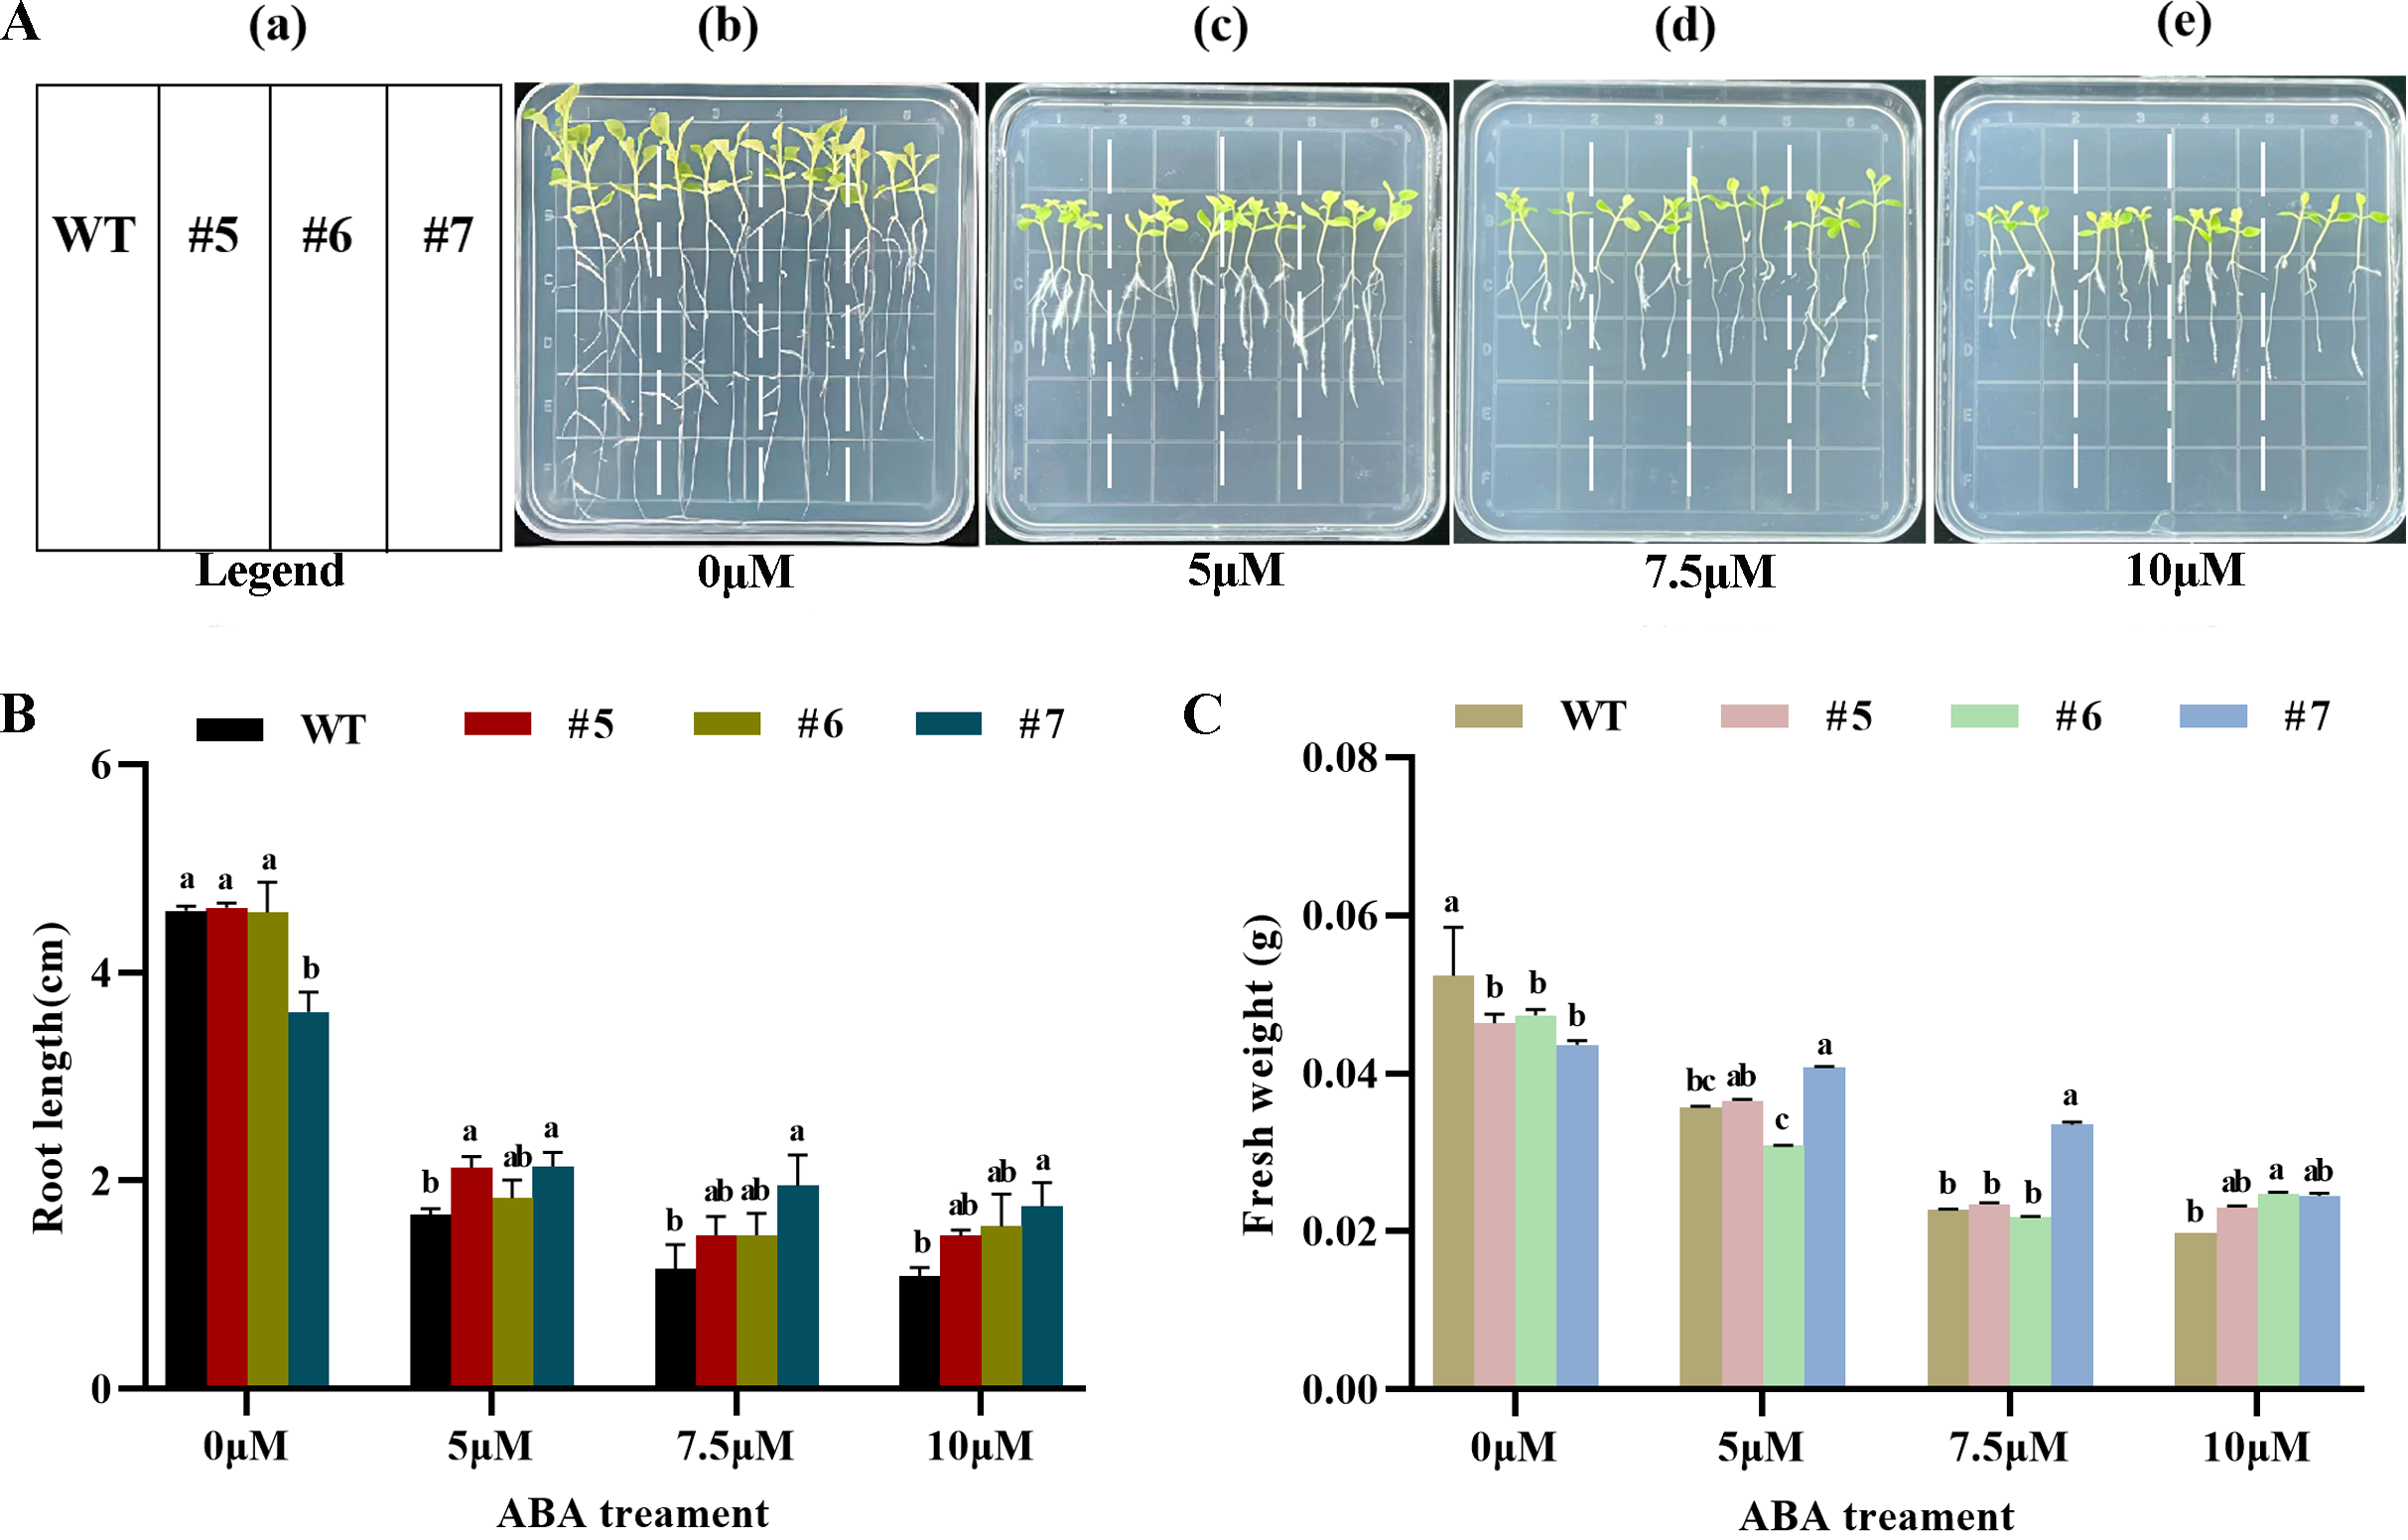


**Supplementary Figure 6.** Analysis of fresh weight and root length of overexpression strain *AfWRKY20* under different concentrations of ABA stress. WT: wild-type plants; #5, #6 and #7 are three different overexpression strains. (A) Phenotype of ABA stress.(B) Plant root length measurement data.(C) Plant fresh weight measurement data. Error lines indicate standard errors of three biological replicates, which are significantly different at the *p*<0.05 level.
